# Supplementary material for: Automatic Facial Expression Recognition in Standardized and Non-standardized Emotional Expressions
Source: PubMed Central journal article supplement (PMC8131548; doi:10.3389/fpsyg.2021.627561), 2021-05-05
Supplement: Data_Sheet_1.pdf [file Data_Sheet_1.pdf]

## Supplementary Material

### 1 SUPPLEMENTARY TABLES AND FIGURES

#### 1.1 Figures

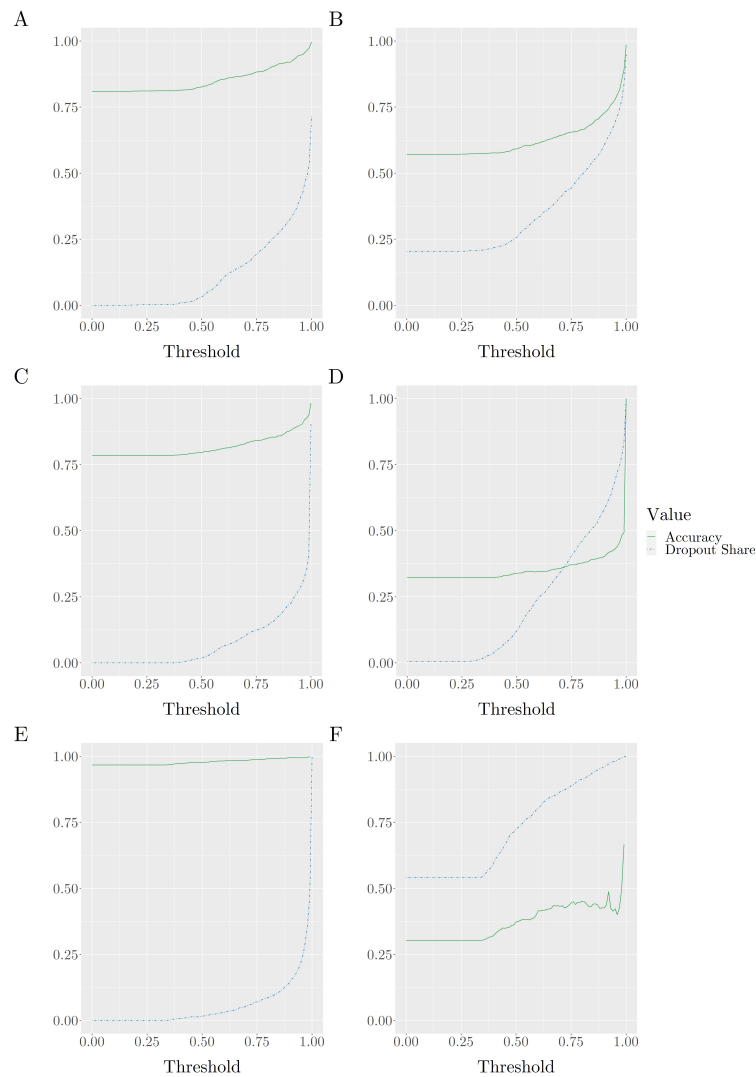

**Figure S1.** This Figure depicts the accuracy and drop out rate for varying thresholds for (A) the standardized data by Azure, (B) the non-standardized data by Azure, (C) the standardized data by Face++, (D) the non-standardized data by Face++, (E) the standardized data by FaceReader and (F) the non-standardized data by FaceReader. The threshold runs from 0 to 1 and describes the minimum certainty of the correct class to be accepted. Example: For a threshold of 0.75, an image is considered as correctly classified, if the correct class is (1) given the highest probability of all classes and (2) this probability is 0.75 or higher. Reading example for Figure (A): At a threshold of 0.75, the accuracy is  $\approx 0.88$ , however  $\approx 18\%$  of the images cannot be classified, since the certainty is too high (Dropout Share  $\approx 0.18$ ).

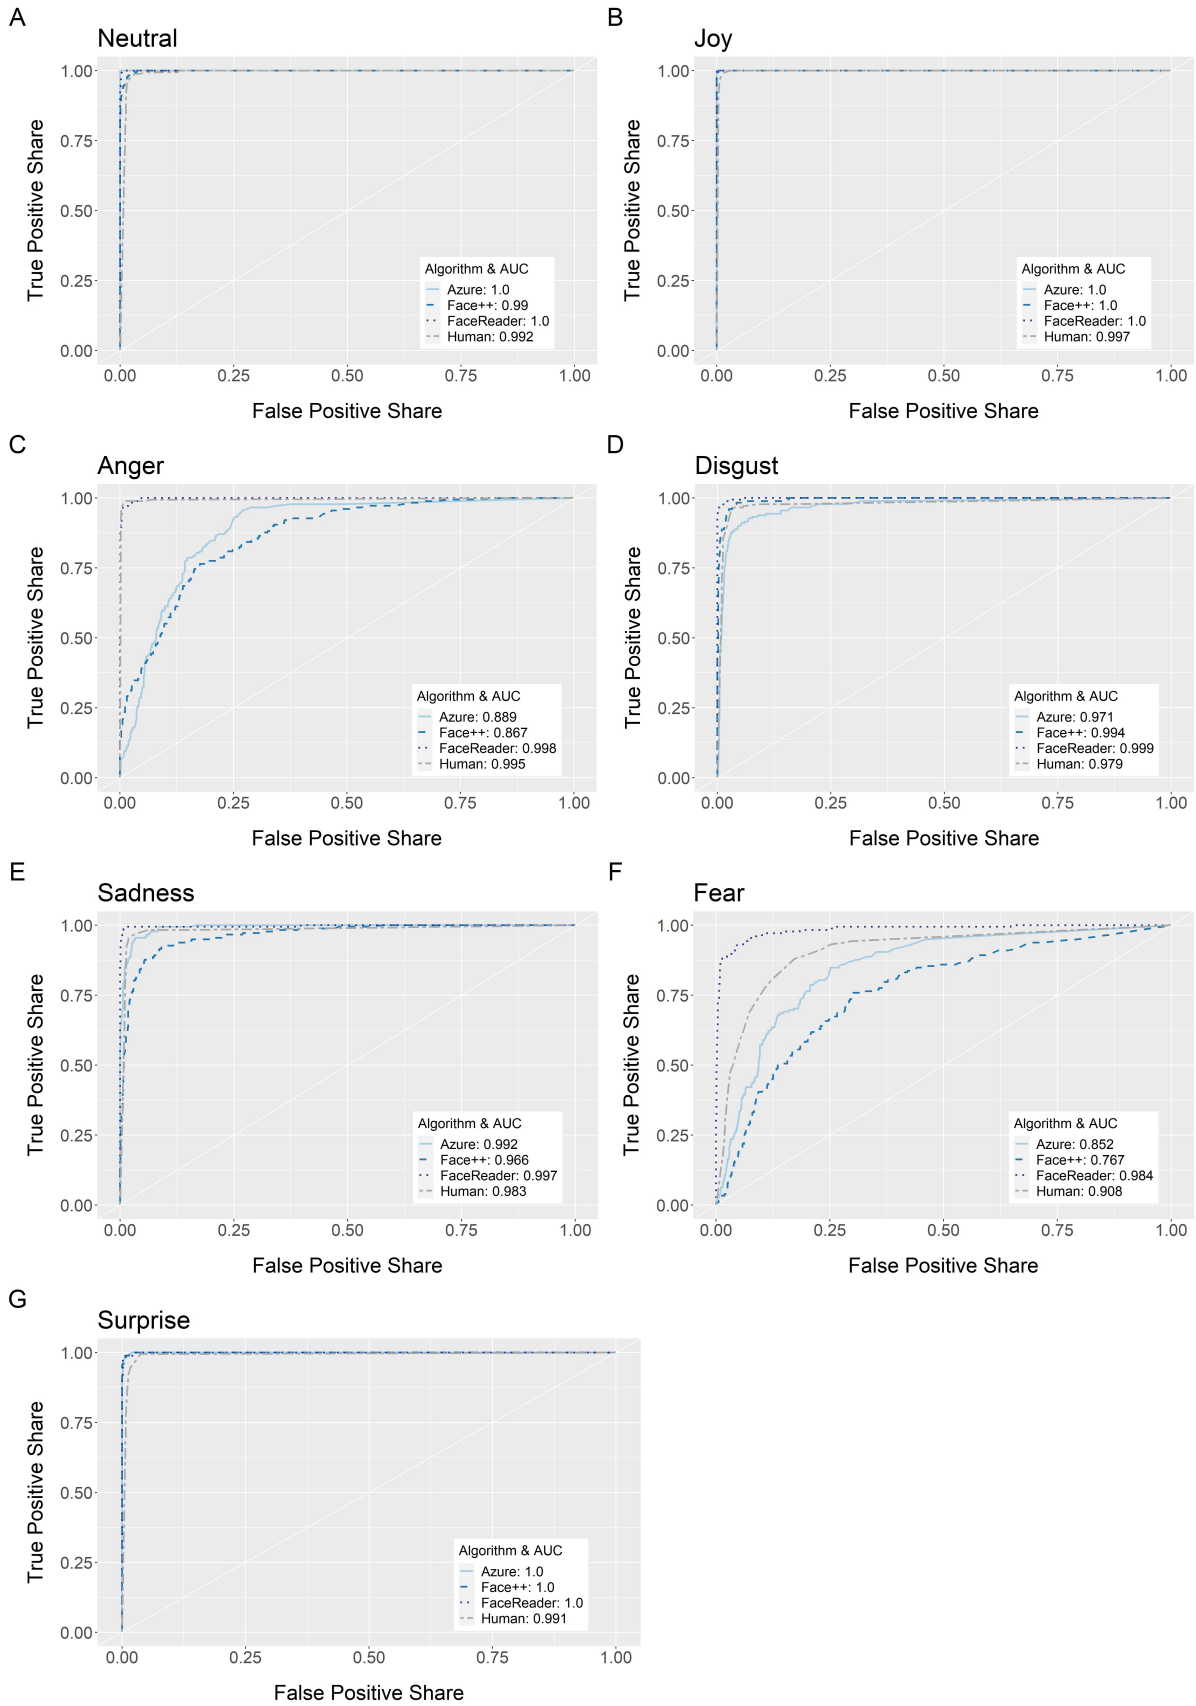

**Figure S2.** This Figure depicts ROC curves and the AUCs in the standardized data for each category: (A) for neutral, (B) for joy, (C) for anger, (D) for disgust, (E) for Sadness, (F) for fear, and (G) for surprise.

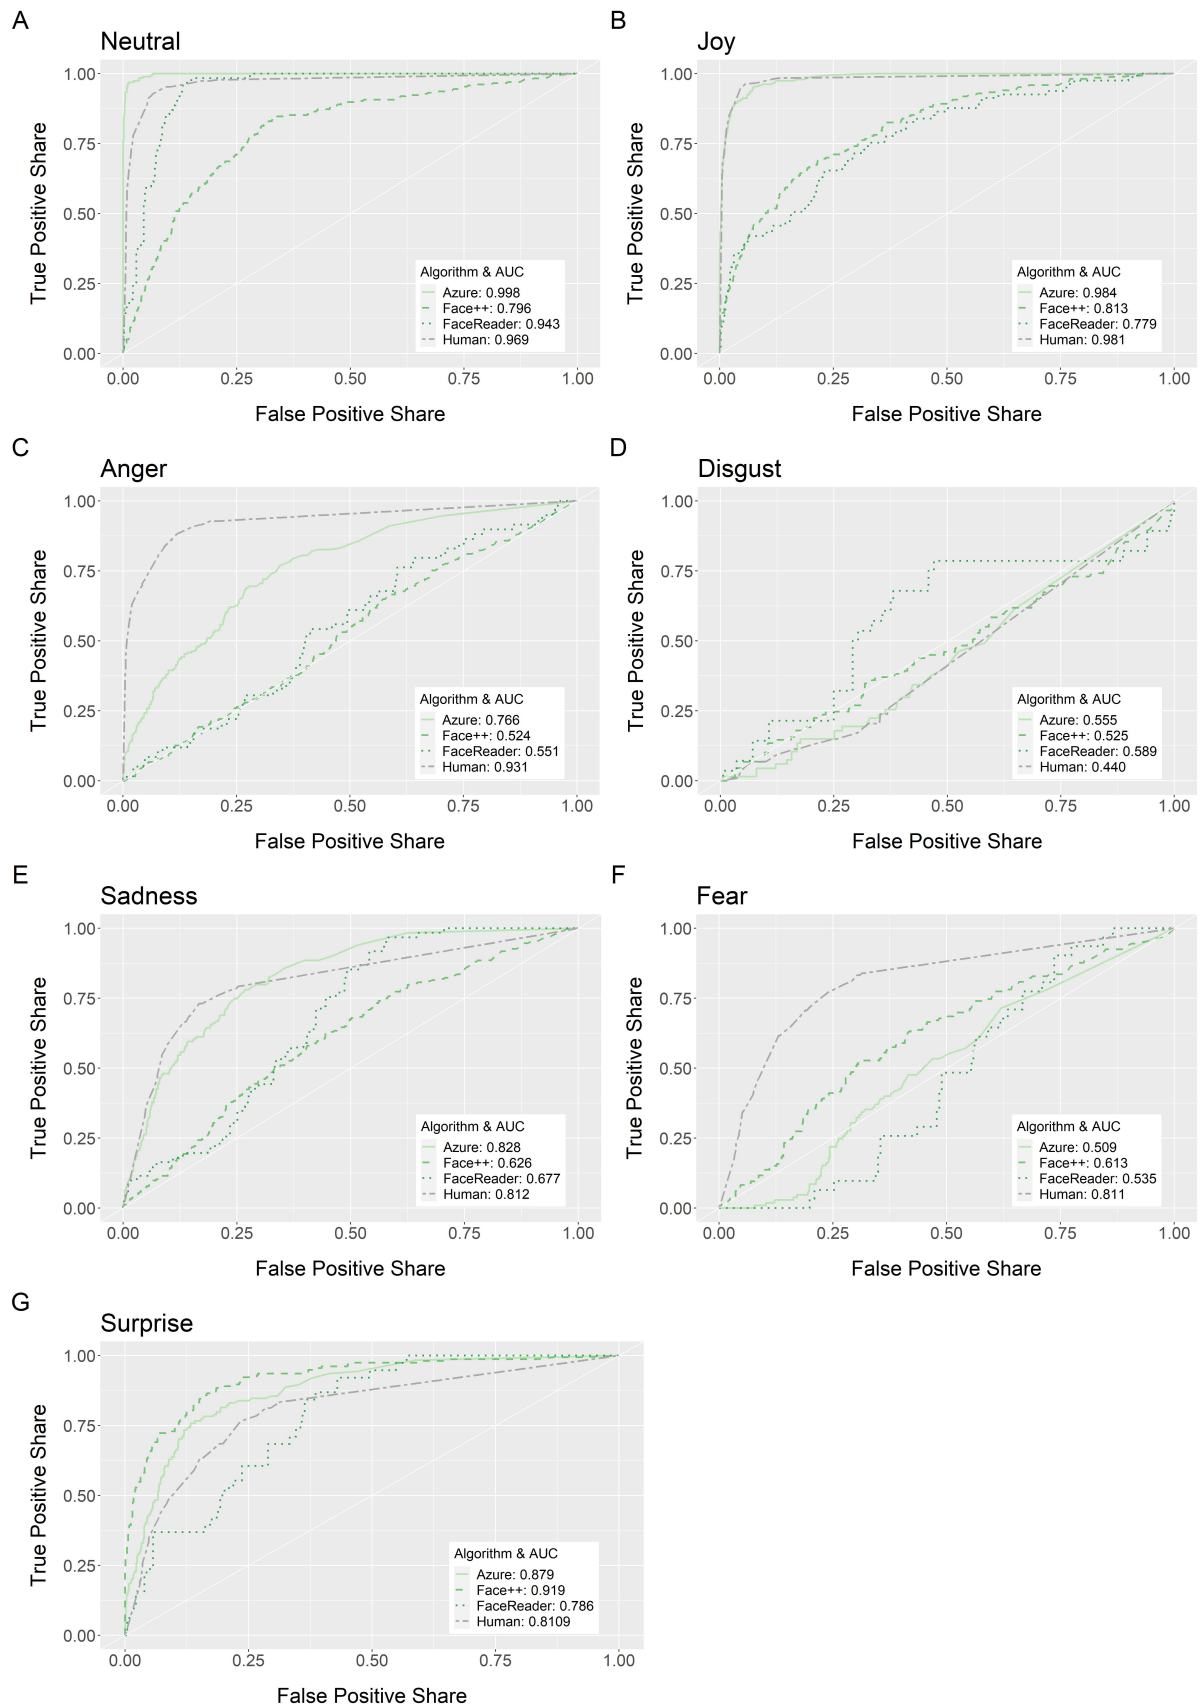

**Figure S3.** This Figure depicts ROC curves and the AUCs in the non-standardized data for each category: (A) for neutral, (B) for joy, (C) for anger, (D) for disgust, (E) for sadness, (F) for fear, and (G) for surprise.

## 1.2 Tables

**Table S1.** Pairwise  $X^2$  Comparisons of Drop Out Rates

| Algorithm 1 | Algorithm 2 | Data       | Drop Out 1 | Drop Out 2 | $X^2$  | p     |
|-------------|-------------|------------|------------|------------|--------|-------|
| Face++      | Azure       | Stand.     | 0.0        | 0.0        | –      | –     |
| Face++      | FaceReader  | Stand.     | 0.0        | 0.88       | 9.13   | .003  |
| FaceReader  | Azure       | Stand.     | 0.88       | 0.0        | 9.13   | .003  |
| Face++      | Azure       | Non-Stand. | 0.5        | 20.3       | 289.99 | <.001 |
| Face++      | FaceReader  | Non-Stand. | 0.5        | 74.2       | 1606   | <.001 |
| FaceReader  | Azure       | Non-Stand. | 74.2       | 20.3       | 804.89 | <.001 |

Note: Degrees of Freedom are = 1 for all tests. ‘Stand.’ describes the standardized data. ‘Non-Stand.’ describes the non-standardized data. Drop Out rates are given in %.

**Table S2.** Pairwise  $X^2$  Comparisons of Accuracies

| Algorithm 1 | Algorithm 2 | Data         | Accuracy 1 | Accuracy 2 | $X^2$  | p      |
|-------------|-------------|--------------|------------|------------|--------|--------|
| Face++      | Azure       | Stand.       | 0.786      | 0.810      | 2.09   | .148   |
| Face++      | FaceReader  | Stand.       | 0.786      | 0.967      | 184.4  | < .001 |
| FaceReader  | Azure       | Stand.       | 0.967      | 0.810      | 152.10 | < .001 |
| Face++      | Azure       | Non-Stand.   | 0.322      | 0.571      | 153.43 | < .001 |
| Face++      | FaceReader  | Non-Stand.   | 0.322      | 0.310      | 0.15   | .700   |
| FaceReader  | Azure       | Non-Stand.   | 0.310      | 0.571      | 72.65  | < .001 |
| Face++      | Azure       | Non-St.-Sub. | 0.316      | 0.577      | 46.45  | < .001 |
| Face++      | FaceReader  | Non-St.-Sub. | 0.316      | 0.316      | 0.00   | 1.00   |
| FaceReader  | Azure       | Non-St.-Sub. | 0.316      | 0.577      | 46.45  | < .001 |

Note: Degrees of Freedom are = 1 for all tests. ‘Stand.’ describes the standardized data. ‘Non-Stand.’ describes non-standardized data. ‘Non-St.-Sub.’ describes the subset of non-standardized images recognized by all algorithms. Values for accuracies are rounded.

**Table S3.** Share of Correctly Identified Images

|          | Azure  |            | Face++ |            | FaceReader |            |
|----------|--------|------------|--------|------------|------------|------------|
|          | Stand. | Non-Stand. | Stand. | Non-Stand. | Stand.     | Non-Stand. |
| Neutral  | 1.0    | 0.78       | 0.94   | 0.40       | 0.99       | 0.35       |
| Joy      | 1.0    | 0.76       | 0.99   | 0.47       | 1.0        | 0.18       |
| Anger    | 0.51   | 0.29       | 0.49   | 0.15       | 0.96       | 0.05       |
| Disgust  | 0.85   | 0.08       | 0.89   | 0.16       | 0.97       | 0.06       |
| Sadness  | 0.88   | 0.36       | 0.81   | 0.18       | 0.98       | 0.07       |
| Fear     | 0.46   | 0.02       | 0.40   | 0.18       | 0.88       | 0.01       |
| Surprise | 0.98   | 0.46       | 0.97   | 0.68       | 0.98       | 0.17       |
| Total    | 0.81   | 0.45       | 0.79   | 0.32       | 0.96       | 0.14       |

Note: ‘Stand.’ describes the standardized data. ‘Non-Stand.’ describes non-standardized data.

**Table S4.** Sensitivity, Precision & Accuracy for the Non-Standardized Data Subset Recognized by all Algorithms

|          | Azure |      | Face++ |      | FaceReader |      |
|----------|-------|------|--------|------|------------|------|
|          | Sens  | Prec | Sens   | Prec | Sens       | Prec |
| Neutral  | 0.93  | 0.38 | 0.38   | 0.37 | 0.68       | 0.21 |
| Joy      | 0.93  | 0.85 | 0.51   | 0.76 | 0.42       | 0.92 |
| Anger    | 0.32  | 0.82 | 0.11   | 0.38 | 0.14       | 0.47 |
| Disgust  | 0.12  | 0.33 | 0.12   | 0.15 | 0.15       | 0.17 |
| Sadness  | 0.49  | 0.76 | 0.15   | 0.31 | 0.17       | 0.32 |
| Fear     | 0.00  | 0.00 | 0.07   | 0.06 | 0.00       | 0.00 |
| Surprise | 0.53  | 0.47 | 0.74   | 0.19 | 0.35       | 0.32 |
| Average  | 0.47  | 0.52 | 0.3    | 0.32 | 0.27       | 0.35 |
| Accuracy | 0.58  |      | 0.32   |      | 0.32       |      |

Note: The category distribution over the subset is as follows: Neutral: 60, Happy: 81, Angry: 57, Disgust: 26, Surprise: 34, Sad: 59, Fear: 28.

**Table S5.** Pairwise Bootstrapped Comparisons of AUCs

| Category | Algorithm 1 | Algorithm 2 | Data       | AUC 1 | AUC 2 | D       | p      |
|----------|-------------|-------------|------------|-------|-------|---------|--------|
| All      | Face++      | Azure       | Stand.     | 0.964 | 0.975 | -4.45   | <0.001 |
| All      | Face++      | FaceReader  | Stand.     | 0.964 | 0.998 | -12.23  | <0.001 |
| All      | FaceReader  | Azure       | Stand.     | 0.998 | 0.975 | 9.92    | <0.001 |
| All      | Human       | Azure       | Stand.     | 0.982 | 0.975 | 2.10    | 0.035  |
| All      | Human       | Face++      | Stand.     | 0.982 | 0.964 | 5.04    | <0.001 |
| All      | Human       | FaceReader  | Stand.     | 0.982 | 0.998 | -6.95   | <0.001 |
| All      | Face++      | Azure       | Non-Stand. | 0.698 | 0.858 | -16.336 | <0.001 |
| All      | Face++      | FaceReader  | Non-Stand. | 0.698 | 0.712 | -0.92   | 0.360  |
| All      | FaceReader  | Azure       | Non-Stand. | 0.712 | 0.858 | -9.44   | <0.001 |
| All      | Human       | Azure       | Non-Stand. | 0.874 | 0.858 | 1.90    | 0.058  |
| All      | Human       | Face++      | Non-Stand. | 0.874 | 0.698 | 18.48   | <0.001 |
| All      | Human       | FaceReader  | Non-Stand. | 0.874 | 0.712 | 10.63   | <0.001 |
| All      | Face++      | Azure       | Nat. Sub.  | 0.707 | 0.863 | -10.10  | <0.001 |
| All      | Face++      | FaceReader  | Nat. Sub.  | 0.707 | 0.717 | -0.52   | 0.601  |
| All      | FaceReader  | Azure       | Nat. Sub.  | 0.717 | 0.863 | -8.11   | <0.001 |
| Neutral  | Face++      | Azure       | Stand.     | 0.999 | 1.0   | -2.80   | 0.005  |
| Neutral  | Face++      | FaceReader  | Stand.     | 0.999 | 1.0   | -2.43   | 0.015  |
| Neutral  | FaceReader  | Azure       | Stand.     | 1.0   | 1.0   | -1.54   | 0.124  |
| Neutral  | Human       | Azure       | Stand.     | 0.992 | 1.0   | -3.89   | <0.001 |
| Neutral  | Human       | Face++      | Stand.     | 0.992 | 0.999 | -3.27   | 0.001  |
| Neutral  | Human       | FaceReader  | Protot     | 0.992 | 1.0   | -3.70   | <0.001 |
| Joy      | Face++      | Azure       | Stand.     | 1.0   | 1.0   | -1.06   | 0.288  |
| Joy      | Face++      | FaceReader  | Stand.     | 1.0   | 1.0   | -1.01   | 0.312  |
| Joy      | FaceReader  | Azure       | Stand.     | 1.0   | 1.0   | 0       | 1      |

*Table continues on the next page.*

**Table S5.** Pairwise Bootstrapped Comparisons of AUCs (*continued*)

|          |            |            |            |       |       |        |        |
|----------|------------|------------|------------|-------|-------|--------|--------|
| Joy      | Human      | Azure      | Stand.     | 0.997 | 1.0   | -2.28  | 0.023  |
| Joy      | Human      | Face++     | Stand.     | 0.997 | 1.0   | -2.22  | 0.027  |
| Joy      | Human      | FaceReader | Protot     | 0.997 | 1.0   | -2.26  | 0.024  |
| Anger    | Face++     | Azure      | Stand.     | 0.867 | 0.889 | -1.68  | 0.093  |
| Anger    | Face++     | FaceReader | Stand.     | 0.867 | 0.998 | -9.94  | <0.001 |
| Anger    | FaceReader | Azure      | Stand.     | 0.998 | 0.889 | 9.90   | <0.001 |
| Anger    | Human      | Azure      | Stand.     | 0.995 | 0.889 | 8.99   | <0.001 |
| Anger    | Human      | Face++     | Stand.     | 0.995 | 0.867 | 9.49   | <0.001 |
| Anger    | Human      | FaceReader | Stand.     | 0.995 | 0.998 | -0.93  | 0.353  |
| Disgust  | Face++     | Azure      | Stand.     | 0.994 | 0.971 | 3.68   | <0.001 |
| Disgust  | Face++     | FaceReader | Stand.     | 0.994 | 0.999 | -2.98  | 0.003  |
| Disgust  | FaceReader | Azure      | Stand.     | 0.999 | 0.971 | 4.19   | <0.001 |
| Disgust  | Human      | Azure      | Stand.     | 0.979 | 0.971 | 0.76   | 0.45   |
| Disgust  | Human      | Face++     | Stand.     | 0.979 | 0.994 | -2.28  | 0.023  |
| Disgust  | Human      | FaceReader | Protot     | 0.979 | 0.999 | -3.09  | 0.002  |
| Sadness  | Face++     | Azure      | Stand.     | 0.966 | 0.992 | -4.60  | <0.001 |
| Sadness  | Face++     | FaceReader | Stand.     | 0.966 | 0.997 | -4.62  | <0.001 |
| Sadness  | FaceReader | Azure      | Stand.     | 0.997 | 0.992 | 1.75   | 0.079  |
| Sadness  | Human      | Azure      | Stand.     | 0.983 | 0.992 | -1.63  | 0.104  |
| Sadness  | Human      | Face++     | Stand.     | 0.983 | 0.966 | 1.92   | 0.055  |
| Sadness  | Human      | FaceReader | Protot     | 0.983 | 0.997 | -2.30  | 0.021  |
| Fear     | Face++     | Azure      | Stand.     | 0.767 | 0.852 | -5.22  | <0.001 |
| Fear     | Face++     | FaceReader | Stand.     | 0.767 | 0.984 | -10.89 | <0.001 |
| Fear     | FaceReader | Azure      | Stand.     | 0.984 | 0.852 | 8.79   | <0.001 |
| Fear     | Human      | Azure      | Stand.     | 0.908 | 0.852 | 2.99   | 0.003  |
| Fear     | Human      | Face++     | Stand.     | 0.908 | 0.767 | 5.99   | <0.001 |
| Fear     | Human      | FaceReader | Protot     | 0.908 | 0.984 | -5.94  | <0.001 |
| Surprise | Face++     | Azure      | Stand.     | 1.0   | 1.0   | 0.49   | 0.627  |
| Surprise | Face++     | FaceReader | Stand.     | 1.0   | 1.0   | 0.29   | 0.772  |
| Surprise | FaceReader | Azure      | Stand.     | 1.0   | 1.0   | -0.09  | 0.931  |
| Surprise | Human      | Azure      | Stand.     | 0.991 | 1.0   | -2.51  | 0.012  |
| Surprise | Human      | Face++     | Stand.     | 0.991 | 1.0   | -2.48  | 0.013  |
| Surprise | Human      | FaceReader | Protot     | 0.991 | 1.0   | -2.51  | 0.012  |
| Neutral  | Face++     | Azure      | Non-Stand. | 0.796 | 0.998 | -11.76 | <0.001 |
| Neutral  | Face++     | FaceReader | Non-Stand. | 0.796 | 0.943 | -7.81  | <0.001 |
| Neutral  | FaceReader | Azure      | Non-Stand. | 0.943 | 0.998 | -5.06  | <0.001 |
| Neutral  | Human      | Azure      | Non-Stand. | 0.969 | 0.998 | -4.34  | <0.001 |
| Neutral  | Human      | Face++     | Non-Stand. | 0.969 | 0.796 | 10.33  | <0.001 |
| Neutral  | Human      | FaceReader | Non-Stand. | 0.969 | 0.943 | 2.09   | 0.037  |
| Joy      | Face++     | Azure      | Non-Stand. | 0.813 | 0.984 | -12.07 | <0.001 |
| Joy      | Face++     | FaceReader | Non-Stand. | 0.813 | 0.779 | 1.05   | 0.291  |
| Joy      | FaceReader | Azure      | Non-Stand. | 0.779 | 0.984 | -7.29  | <0.001 |

*Table continues on the next page.*

**Table S5.** Pairwise Bootstrapped Comparisons of AUCs (*continued*)

|          |            |            |            |       |       |        |         |
|----------|------------|------------|------------|-------|-------|--------|---------|
| Joy      | Human      | Azure      | Non-Stand. | 0.981 | 0.984 | -0.952 | <0.554  |
| Joy      | Human      | Face++     | Non-Stand. | 0.981 | 0.813 | 11.21  | <0.001  |
| Joy      | Human      | FaceReader | Non-Stand. | 0.981 | 0.779 | 7.21   | <0.001  |
| Anger    | Face++     | Azure      | Non-Stand. | 0.524 | 0.766 | -9.15  | <0.001  |
| Anger    | Face++     | FaceReader | Non-Stand. | 0.524 | 0.551 | -0.62  | 0.536   |
| Anger    | FaceReader | Azure      | Non-Stand. | 0.551 | 0.766 | -5.20  | <0.001  |
| Anger    | Human      | Azure      | Non-Stand. | 0.931 | 0.766 | 7.95   | <0.001  |
| Anger    | Human      | Face++     | Non-Stand. | 0.931 | 0.524 | 18.79  | <0.001  |
| Anger    | Human      | FaceReader | Non-Stand. | 0.931 | 0.551 | 9.70   | <0.001  |
| Disgust  | Face++     | Azure      | Non-Stand. | 0.525 | 0.555 | -0.60  | 0.550   |
| Disgust  | Face++     | FaceReader | Non-Stand. | 0.525 | 0.589 | -0.89  | 0.373   |
| Disgust  | FaceReader | Azure      | Non-Stand. | 0.589 | 0.555 | 0.49   | 0.625   |
| Disgust  | Human      | Azure      | Non-Stand. | 0.440 | 0.555 | -2.65  | 0.008   |
| Disgust  | Human      | Face++     | Non-Stand. | 0.931 | 0.525 | -2.02  | 0.043   |
| Disgust  | Human      | FaceReader | Non-Stand. | 0.931 | 0.589 | -2.20  | 0.278   |
| Sadness  | Face++     | Azure      | Non-Stand. | 0.626 | 0.828 | -8.79  | <0.001  |
| Sadness  | Face++     | FaceReader | Non-Stand. | 0.626 | 0.677 | -2.09  | 0.036   |
| Sadness  | FaceReader | Azure      | Non-Stand. | 0.677 | 0.828 | -4.64  | <0.001  |
| Sadness  | Human      | Azure      | Non-Stand. | 0.812 | 0.828 | -0.76  | 0.448   |
| Sadness  | Human      | Face++     | Non-Stand. | 0.812 | 0.626 | 8.41   | <0.001  |
| Sadness  | Human      | FaceReader | Non-Stand. | 0.812 | 0.677 | 4.12   | <0.001  |
| Fear     | Face++     | Azure      | Non-Stand. | 0.613 | 0.509 | 2.85   | 0.004   |
| Fear     | Face++     | FaceReader | Non-Stand. | 0.613 | 0.535 | 1.54   | 0.122   |
| Fear     | FaceReader | Azure      | Non-Stand. | 0.535 | 0.509 | 0.52   | 0.600   |
| Fear     | Human      | Azure      | Non-Stand. | 0.811 | 0.509 | 9.03   | <<0.001 |
| Fear     | Human      | Face++     | Non-Stand. | 0.811 | 0.613 | 6.24   | <0.001  |
| Fear     | Human      | FaceReader | Non-Stand. | 0.811 | 0.535 | 5.81   | <0.001  |
| Surprise | Face++     | Azure      | Non-Stand. | 0.919 | 0.879 | 1.92   | 0.055   |
| Surprise | Face++     | FaceReader | Non-Stand. | 0.919 | 0.786 | 3.86   | <0.001  |
| Surprise | FaceReader | Azure      | Non-Stand. | 0.786 | 0.879 | -2.57  | 0.101   |
| Surprise | Human      | Azure      | Non-Stand. | 0.809 | 0.879 | -2.77  | 0.006   |
| Surprise | Human      | Face++     | Non-Stand. | 0.809 | 0.919 | -4.68  | <0.001  |
| Surprise | Human      | FaceReader | Non-Stand. | 0.809 | 0.786 | 0.62   | 0.535   |

Note: *Stand.* is short for standardized data. *Non-Stand.* is short for non-standardized data. *Nat. Sub.* is short for the subset of non-standardized images recognized by all algorithms. Values for AUCs, D and p are rounded.
